# Supplementary material for: A Side-by-Side Comparison of Wildtype and Variant Melanocortin 1 Receptor Signaling with Emphasis on Protection against Oxidative Damage to DNA
Source: MDPI journal article supplement (doi:10.3390/ijms241814381), 2023-09-21
Supplement: s1 [file s1]

| CRISPR-RNA | Target sequence       | PAM | Score efficiency | Off-targets |
|------------|-----------------------|-----|------------------|-------------|
| sgRNA1     | TCGACACCTCTGGACCGTCC  | TGG | 92.0             | 45          |
| sgRNA2     | CCAGGACATTTTCGACACCTC | TGG | 90.7             | 68          |
| sgRNA3     | GAGCTTGGTGGAGAACGCGC  | TGG | 90.5             | 79          |
| sgRNA4 (*) | CATCGCCTACTACGACCACG  | TGG | 98.1             | 14          |

**Supplementary Table S1.** Target and protospacer adjacent motif (PAM) sequences, score efficiency and number of off-targets for each sgRNA. (\*) For sgRNA4, primers sequences are:  
hMC1R\_CRISPR\_top: 5'-CACCGCATCGCCTACTACGACCACG-3' and  
hMC1R\_CRISPR\_bottom: 5'-AAACCGTGGTCGTAGTAGGCGATGC-3'.

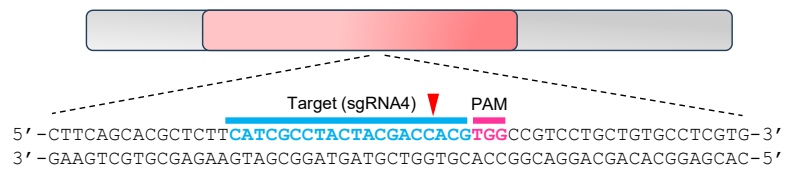

**Supplementary Figure 1.** Schematic representation of the coding exon (red rectangle: CDS; grey rectangle: full exon) of MC1R gene highlighting the sequence targeted by sgRNA4. This 20 nt sequence pairs with the DNA target (blue bar on top strand), directly upstream of a 5'-NGG adjacent motif (PAM; in pink). Cas9 mediates the DSB ~3 bp upstream of the PAM (red triangle).
